# Supplementary material for: Two novel amino acid substitutions in highly conserved regions of prion protein (PrP) and a high frequency of a scrapie protective variant in native Ethiopian goats
Source: PubMed Central journal article supplement (PMC6500044; doi:10.1186/s12917-019-1870-4), 2019-05-03
Supplement: 12917_2019_1870_MOESM2_ESM.pdf [file 12917_2019_1870_MOESM2_ESM.pdf]

Table 3:Genotype combinations

| 127<br>G/A | 143<br>H/R | 146<br>N/S | 154<br>R/H | 193<br>T/I | 240<br>S/P | Western<br>Highland<br>% (N) | Central<br>Highland<br>% (N) | Long Eared<br>Somali<br>% (N) | All<br>% (N)      |
|------------|------------|------------|------------|------------|------------|------------------------------|------------------------------|-------------------------------|-------------------|
| <b>GG</b>  | <b>HH</b>  | <b>NN</b>  | <b>RR</b>  | <b>TT</b>  | <b>SS</b>  | 3.6 (4)                      | 1.9 (1)                      | 3.0 (2)                       | <b>3.06 (7)</b>   |
| -          | -          | -          | -          | -          | <b>PP</b>  | 12.8 (14)                    | 17.3 (9)                     | 14.9 (10)                     | <b>14.41 (33)</b> |
| -          | -          | -          | -          | -          | <b>SP</b>  | 9.1 (10)                     | 15.3 (8)                     | 6.0 (4)                       | <b>9.61 (22)</b>  |
| <b>GA</b>  | -          | <b>NS</b>  | -          | -          | <b>PP</b>  | 3.6 (4)                      | 1.9 (1)                      | 3.0 (2)                       | <b>3.06 (7)</b>   |
| <b>GA</b>  | -          | -          | -          | -          | <b>PP</b>  | 1.8 (2)                      | 1.9 (1)                      | 0                             | <b>1.31 (3)</b>   |
| <b>GA</b>  | -          | -          | -          | -          | <b>SP</b>  | 0.9 (1)                      | 0                            | 0                             | <b>0.44 (1)</b>   |
| <b>GA</b>  | -          | -          | -          | <b>TI</b>  | <b>PP</b>  | 1.8 (2)                      | 0                            | 0                             | <b>0.87 (2)</b>   |
| -          | <b>HR</b>  | -          | -          | -          | <b>SP</b>  | 0                            | 0                            | 1.5 (1)                       | <b>0.44 (1)</b>   |
| -          | -          | <b>NS</b>  | -          | -          | <b>PP</b>  | 29.1 (32)                    | 13.5 (7)                     | 35.8 (24)                     | <b>27.51 (63)</b> |
| -          | -          | <b>NS</b>  | -          | -          | <b>SP</b>  | 8.2 (9)                      | 21.2 (11)                    | 11.9 (8)                      | <b>12.23 (28)</b> |
| -          | -          | <b>NS</b>  | <b>RH</b>  | -          | <b>SP</b>  | 0                            | 0                            | 1.5 (1)                       | <b>0.44 (1)</b>   |
| -          | -          | <b>NS</b>  | -          | <b>TI</b>  | <b>PP</b>  | 9.1 (10)                     | 5.8 (3)                      | 3.0 (2)                       | <b>6.55 (15)</b>  |
| -          | -          | <b>SS</b>  | -          | -          | <b>PP</b>  | 15.5 (17)                    | 13.5 (7)                     | 11.9 (8)                      | <b>13.97 (32)</b> |
| -          | -          | -          | <b>RH</b>  | -          | <b>PP</b>  | 0.9 (1)                      | 0                            | 1.5 (1)                       | <b>0.87 (2)</b>   |
| -          | -          | -          | <b>RH</b>  | -          | <b>SP</b>  | 0                            | 0                            | 1.5 (1)                       | <b>0.44 (1)</b>   |
| -          | -          | -          | <b>RH</b>  | <b>TI</b>  | <b>SP</b>  | 0                            | 0                            | 1.5 (1)                       | <b>0.44 (1)</b>   |
| -          | -          | -          | -          | <b>TI</b>  | <b>PP</b>  | 3.6 (4)                      | 1.9 (1)                      | 3.0 (2)                       | <b>3.06 (7)</b>   |
| -          | -          | -          | -          | <b>TI</b>  | <b>SP</b>  | 0                            | 5.8 (3)                      | 0                             | <b>1.31 (3)</b>   |
|            |            |            |            |            |            | <b>100 (110)</b>             | <b>100 (52)</b>              | <b>100 (67)</b>               | <b>100 (229)</b>  |
